# Supplementary material for: Quick and efficient approach to develop genomic resources in orphan species: Application in Lavandula angustifolia
Source: PubMed Central journal article supplement (PMC7732122; doi:10.1371/journal.pone.0243853), 2020-12-11
Supplement: pone.0243853.s002.pdf [file pone.0243853.s002.pdf]

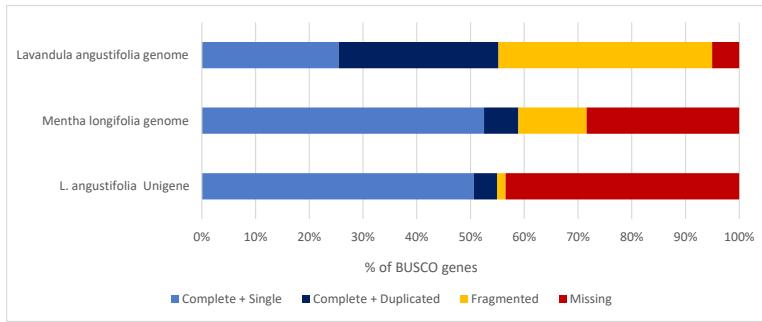

**S2 Fig.** Comparison of the completeness of lavender Unigene with the completeness of *Lavandula angustifolia* and *Mentha longifolia* genomes using BUSCO.
