# Supplementary material for: Quick and efficient approach to develop genomic resources in orphan species: Application in Lavandula angustifolia
Source: PubMed Central journal article supplement (PMC7732122; doi:10.1371/journal.pone.0243853), 2020-12-11
Supplement: pone.0243853.s003.pdf [file pone.0243853.s003.pdf]

**Distribution of the mean depth of coverage values of the 359K SNPs in the 16 lavender clones**

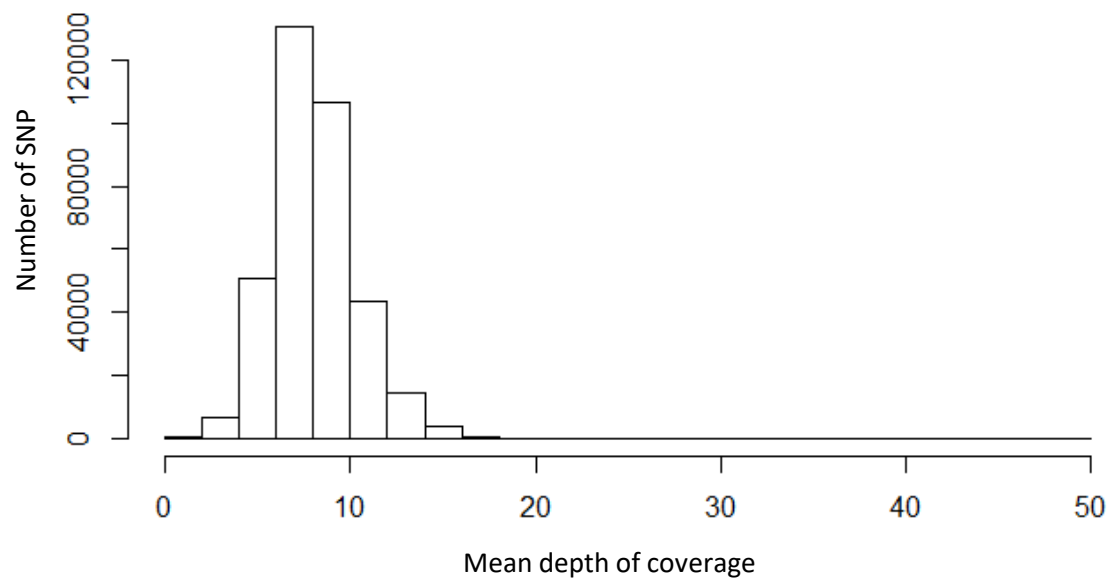

(A)

**Distribution of the depth of coverage of the 359K SNPs summed across the 16 lavender clones**

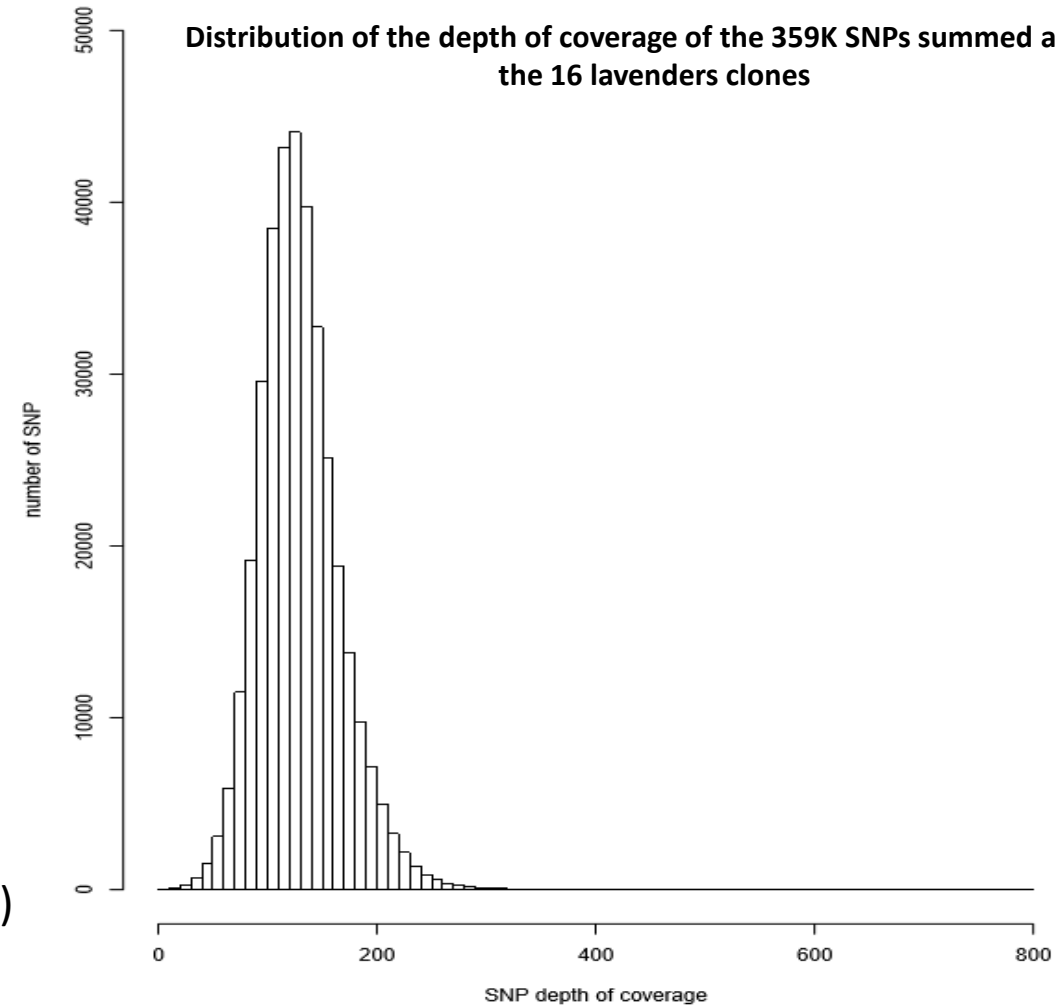

(B)

**S7 Fig. Results for SNP detection in 16 lavender clones.**

(A) Distribution of the mean depth of coverage of SNP in the 16 lavender clones. Data presented for the 359K SNP.

(B) Distribution of the depth of coverage summed across the 16 lavender clones. Data presented for the 359K SNP.
