# Supplementary material for: Quick and efficient approach to develop genomic resources in orphan species: Application in Lavandula angustifolia
Source: PubMed Central journal article supplement (PMC7732122; doi:10.1371/journal.pone.0243853), 2020-12-11
Supplement: pone.0243853.s004.pdf [file pone.0243853.s004.pdf]

S1 Table

| Cultivars  | Geographical origin | Detailed geographical origin | Variety origin                                                                            | Selection criterion                                                             | Comments                                                                                                                    |
|------------|---------------------|------------------------------|-------------------------------------------------------------------------------------------|---------------------------------------------------------------------------------|-----------------------------------------------------------------------------------------------------------------------------|
| Maillette  | France              | Drôme                        | Farmer breeding 40's-50's.                                                                | Essential oil quality, disease resistant and easy to grow in plains. High yield | Widely planted since the 50's. At least 5 clones of Maillette grown in the Alpes-de-Haute-Provence (McLeod, 2000).          |
| 5.90       | France              | South-east                   |                                                                                           | Essential oil yield and quality                                                 |                                                                                                                             |
| 77.13      | France              | Plateau d'Albion (Sault)     | Collected from a field of open-pollinated variety late 90's.                              | Essential oil yield and quality. Tolerant to yellow decline                     | Commercialized in early 2000.                                                                                               |
| B6         | Bulgary             | NA                           | Cultivar obtained from bulgarian breeding program.                                        | Essential oil yield and quality                                                 | Suceptible to yellow decline. Referred to as "blue lavender" in an activity report of CRIEPPAM (M. Pellissier, pers. Com.). |
| B7         | Bulgary             | Kasanlak                     | Cultivar obtained from bulgarian breeding program.                                        | Essential oil yield and quality                                                 | Suceptible to yellow decline.                                                                                               |
| Barthée    | France              | Plateau d'Albion (Sault)     |                                                                                           | Essential oil yield and quality                                                 | Similar to Matheronne -agronomical characteristics- only larger in size.                                                    |
| C15.50     | France              | Plateau d'Albion             | Collected from a field of open-pollinated variety.                                        | Essential oil yield and quality. Initially tolerant to yellow decline           | Quite susceptible to yellow decline nowadays. Commercialized since 90's.                                                    |
| Diva       | France              | Plateau d'Albion             | Collected from a field of open-pollinated variety.                                        | Essential oil yield and quality. Tolerant to yellow decline. High yield.        | Production level equivalent to Maillette.                                                                                   |
| FC28       | France              | Plateau d'Albion             | Collected from a field of open-pollinated variety.                                        | Essential oil yield and quality                                                 | Commercialized since 90's.                                                                                                  |
| Francine   | France              | Drôme (Le Pègue)             | Collected by the Chambre d'Agriculture de la Drôme before 1989.                           | Essential oil yield and quality                                                 |                                                                                                                             |
| Frisée     | France              | South-east                   |                                                                                           | Cut flower                                                                      |                                                                                                                             |
| Gabelle    | France              | South-east                   |                                                                                           | Cut flower                                                                      |                                                                                                                             |
| Matheronne | France              | South-east                   | Farmer breeding in the 40's-50's                                                          | High yield of very good quality essential oil. Tolerant to yellow decline       | Seems to share a common ancestry with at least 77.13, C15.50 and B7 (Chaisse et al., 2012).                                 |
| Ruffinato  | France              | Plateau d'Albion             | Collected from a field of open-pollinated variety.                                        |                                                                                 | Bad essential oil quality.                                                                                                  |
| YC77       | France              | Plateau d'Albion             | Collected from a field of open-pollinated variety.                                        |                                                                                 |                                                                                                                             |
| Grosso     | France              | Vaucluse                     | Spontaneous hybrid discovered in 1972. Commercialized in early 80's (Upson et al., 2004). | Essential oil yield and quality                                                 |                                                                                                                             |

#### References

- Chaisse E, Foissac X, Verdin E, Nicolè F, Bouverat-Bernier JP, Jagoueix-Eveillard S, et al. Amélioration des stratégies de lutte contre le dépérissement de la lavande et du lavandin. *Innov Agron.* 2012;25: 179–192.
- McLeod, J.A. (2000). *Lavender, sweet lavender.* (edn 2 revsed) 146 pp. Kangaroo Press, Australia
- Upson T. & Andrews S. (2004). *The Genus Lavandula* 442 pp. Royal Botanic Gardens Kew, UK
