# Supplementary material for: Quick and efficient approach to develop genomic resources in orphan species: Application in Lavandula angustifolia
Source: PubMed Central journal article supplement (PMC7732122; doi:10.1371/journal.pone.0243853), 2020-12-11
Supplement: pone.0243853.s005.pdf [file pone.0243853.s005.pdf]

S2 Table

| Genotype name                   | Nb reads sequenced | Nb of bases sequenced | Approximate depth of coverage |
|---------------------------------|--------------------|-----------------------|-------------------------------|
| RNA seq                         |                    |                       |                               |
| Maillette Leave                 | 53 266 404         | 8 043 227 004         |                               |
| Maillette Roots (reads 1)       | 59 341 540         | 8 960 572 540         |                               |
| Maillette Flower buds (reads 1) | 56 474 946         | 8 527 716 846         |                               |
| <b>Total</b>                    | <b>169 082 890</b> | <b>25 531 516 390</b> |                               |
| DNA-seq- leaves sample          |                    |                       |                               |
| Maillette                       | 145 227 504        | 21 929 353 104        | 25                            |
| Diva                            | 65 151 226         | 9 837 835 126         | 11                            |
| Ruffinato                       | 67 452 366         | 10 185 307 266        | 12                            |
| B6                              | 89 105 430         | 13 454 919 930        | 15                            |
| B7                              | 30 768 088         | 4 645 981 288         | 5                             |
| Gabelle                         | 57 202 964         | 8 637 647 564         | 10                            |
| Matheronne                      | 29 985 684         | 4 527 838 284         | 5                             |
| Barthée                         | 33 306 066         | 5 029 215 966         | 6                             |
| C15.50                          | 106 240 042        | 16 042 246 342        | 18                            |
| YC77                            | 63 807 640         | 9 634 953 640         | 11                            |
| Frisée                          | 53 330 332         | 8 052 880 132         | 9                             |
| 5.90                            | 75 616 676         | 11 418 118 076        | 13                            |
| FC28                            | 36 269 606         | 5 476 710 506         | 6                             |
| 77.13                           | 33 625 350         | 5 077 427 850         | 6                             |
| Francine                        | 30 954 844         | 4 674 181 444         | 5                             |
